# Supplementary material for: Evolution along the parasitism-mutualism continuum determines the genetic repertoire of prophages
Source: PLOS journal article supplement (doi:10.1371/journal.pcbi.1008482), 2020-12-04
Supplement: S4 (10.1371/journal.pcbi.1008482.s004) [file journal.pcbi.1008482.s004]

# Evolution along the parasitism-mutualism continuum determines the genetic repertoire of prophages

Amjad Khan<sup>1</sup>, Alita R. Burmeister<sup>2, 3</sup>, Lindi M. Wahl<sup>1,\*</sup>

**1** Department of Applied Mathematics, Western University, London, Ontario, Canada.

**2** Department of Ecology and Evolution, Yale University, New Haven, Connecticut, USA.

**3** BEACON Center for the Study of Evolution in Action, East Lansing, Michigan, USA.

\* lwahl@uwo.ca

## S4 Appendix. Transposase distribution.

Fig 1 shows histograms of the total number of transposase sequences identified in each prophage in the two datasets.

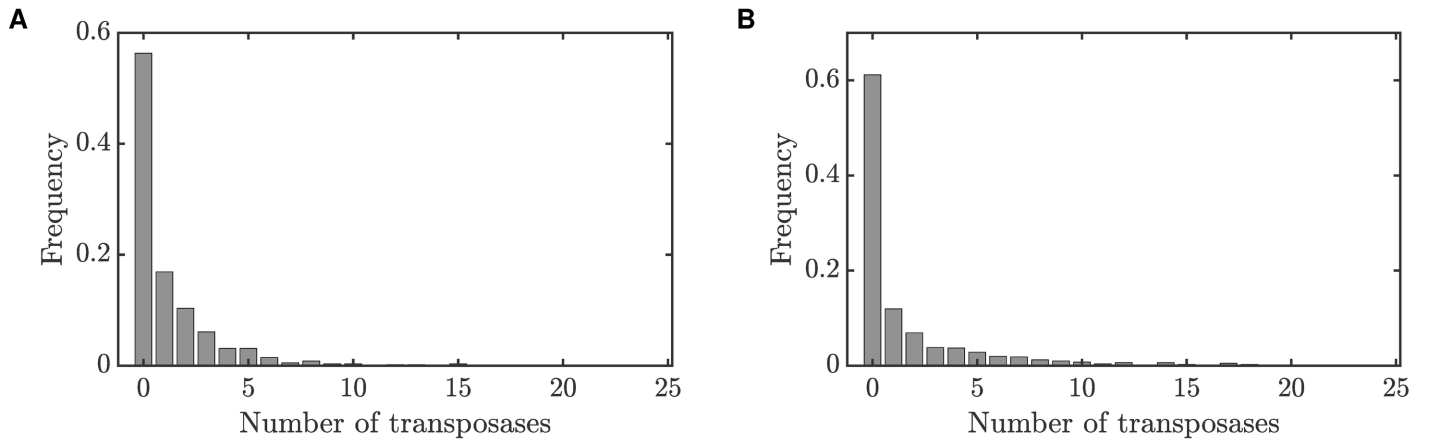

**Fig 1. Frequency histogram of the number of transposase sequences identified in each prophage in (A) Data Set 1; (B) Data Set 2.**
